# Supplementary material for: Photocatalytic degradation of methyl orange at different pH values by NaYF4:Yb3+,Tm3+@TiO2 microrod composite photocatalysts under NIR excitation
Source: Royal Society of Chemistry journal article supplement (doi:10.1039/d6ra00088f), 2026-05-29
Supplement: d6ra00088f1.pdf [file d6ra00088f1.pdf]

### Supplementary Information

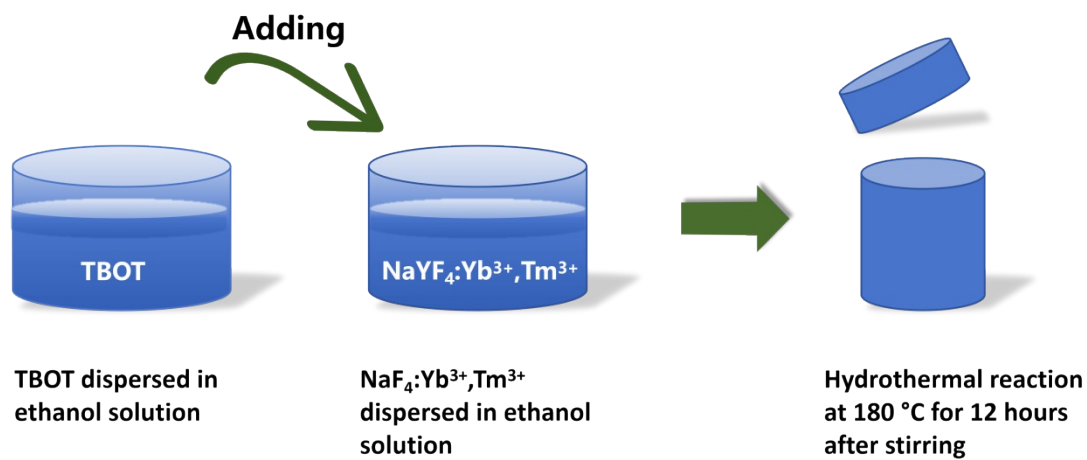

Figure Schematic synthesis route of the as-prepared NaYF<sub>4</sub>:Yb<sup>3+</sup>,Tm<sup>3+</sup>@TiO<sub>2</sub> microrod composite photocatalysts
